# Supplementary material for: A Recent Development of a Network Approach to Assessment Data: Latent Space Item Response Modeling for Intelligence Studies
Source: MDPI journal article supplement (doi:10.3390/jintelligence12040038), 2024-03-28
Supplement: s1 [file s1]

## SUPPLEMENTARY ONLINE MATERIAL

### A Recent Development of a Network Approach to Assessment Data: Latent Space Item Response Modeling for Intelligence Studies

#### S1. Stan code for the *LSIRM* model

```
data {
  int<lower = 1> P;          // number of persons
  int<lower = 1> I;          // number of items
  int<lower = 1> N;          // number of person-item pairs
  int<lower = 1, upper = P> pp[N]; // person index for the n-th obs
  int<lower = 1, upper = I> ii[N]; // item index for the n-th obs
  int<lower=0, upper=1> resp[N];  // response in the long format
  real mu[2];
  real kappa[2];
}

parameters {
  vector[P] std_theta;      // latent ability factors (standardized)
  vector[P] xi1;            // latent person position 1
  vector[P] xi2;            // latent person position 2
  vector[I] b;              // item difficulty parameters
  vector[I] zt1;            // latent item positions 1
  vector[I] zt2;            // latent item positions 1
  real<lower = 0> omega_theta_sq; // variance of latent ability factors
  real log_lambda;          // distance tuning parameter
  real<lower = 0, upper = 1> pind; // PIP
}

transformed parameters{
  vector[P] theta;          // latent ability factors (scaled)
  vector[N] dist;           // distance terms
  real<lower = 0> omega_theta = sqrt(omega_theta_sq);
  real lambda;

  theta = std_theta * omega_theta;
  lambda = exp(log_lambda);
```

```

for (n in 1:N){
  dist[n] = sqrt((xi1[pp[n]] - zt1[ii[n]])^2 + (xi2[pp[n]] - zt2[ii[n]])^2);
}
}

model {
  vector[2] lps;
  lps[1] = log(1-pind);
  lps[2] = log(pind);

  omega_theta_sq ~ cauchy(0, 25);
  std_theta ~ std_normal();
  b ~ normal(0, 5);

  xi1 ~ std_normal();
  xi2 ~ std_normal();
  zt1 ~ std_normal();
  zt2 ~ std_normal();

  pind ~ beta(1,1);

  for(s in 1:2){
    lps[s] += normal_lpdf(log_lambda | mu[s], kappa[s]);
  }
  for (n in 1:N) {
    resp[n] ~ bernoulli_logit(theta[pp[n]] + b[ii[n]] - lambda * dist[n]);
  }
  target += log_sum_exp(lps);
}

```

## S2. Convergence of Bayesian Chains

The histograms of potential scale reduction statistics ( $\hat{R}$ ; Gelman, 1996; Gelman, Carlin, Stern, Dunson, & A. Vehtari, 2013) in Figure S1 and the trace plots of some randomly selected parameters shown in Figures S2-S3 present convergence assessment of the LSIRM model applied to our empirical examples. In general, the results do not imply any convergence issue. The values of  $\hat{R}$  were all smaller than 1.01.

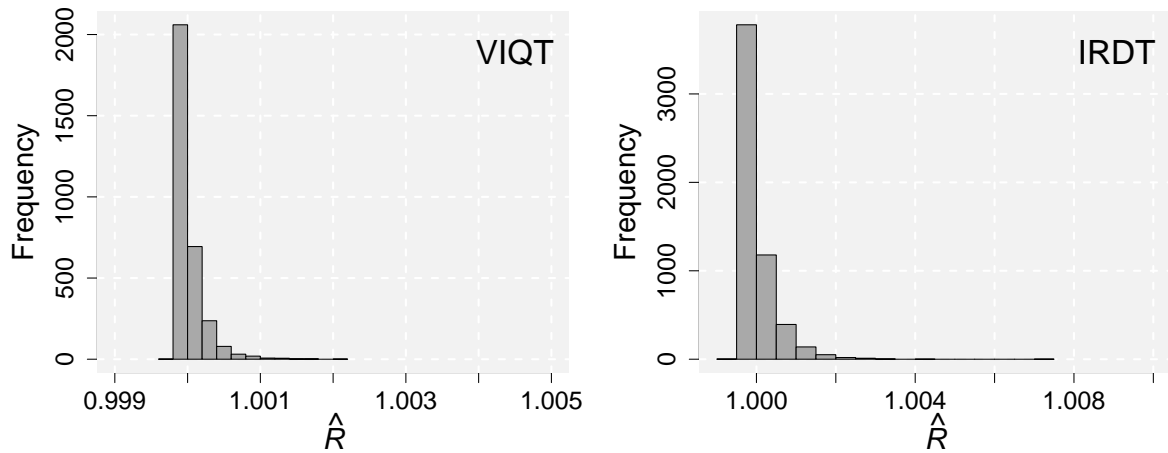

**Figure S1.** Histogram of Potential Scale Reduction Statistics ( $\hat{R}$ ), from the LSIRM fit to the VIQT dataset (left) and the IRDT dataset (right).

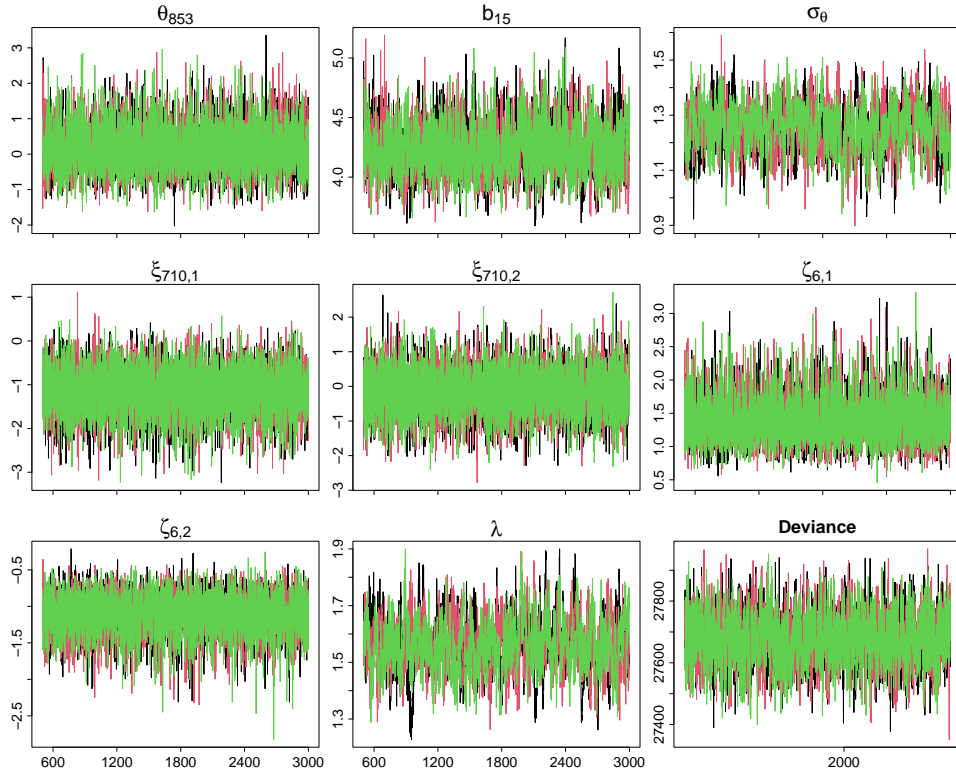

**Figure S2.** Trace Plots of Parameters for Randomly Selected Persons and Items in the VIQT Data Analysis.

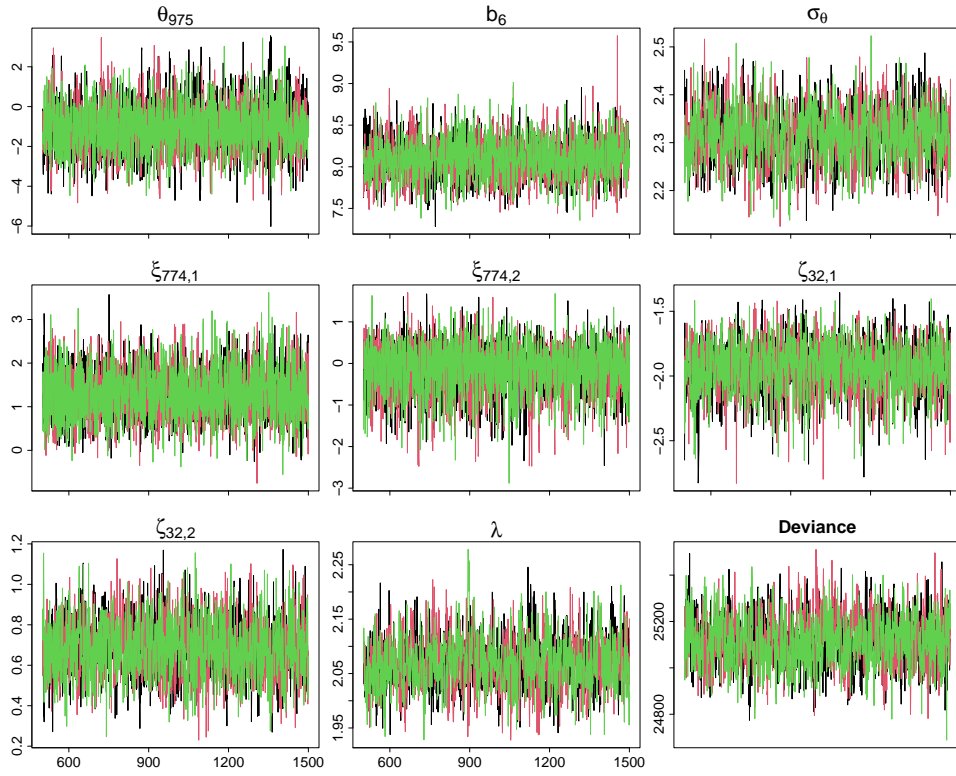

**Figure S3.** Trace Plots of Parameters for Randomly Selected Persons and Items in the IRDT Data Analysis.

## References

- Gelman, A. (1996). Inference and monitoring convergence. In W. R. Gilks, S. Richardson, & D. J. Spiegelhalter (Eds.), *Markov chain Monte Carlo in practice* (p. 131-143). CRC Press.
- Gelman, A., Carlin, J. B., Stern, H. S., Dunson, D. B., & A. Vehtari, D. B. R. (2013). *Bayesian data analysis* (3rd ed.). CRC Press.
